# Supplementary material for: Nitrogen-doped carbon dots as acid–base bifunctional and efficient catalysts for the cycloaddition of CO2 with epoxides
Source: Royal Society of Chemistry journal article supplement (doi:10.1039/d4nj00014e), 2024-01-01
Supplement: d4nj00014e1.pdf [file d4nj00014e1.pdf]

### Supporting Information

Nitrogen-doped carbon dots as acid-base bifunctional and efficient catalysts for the

Cycloaddition of CO<sub>2</sub> to Epoxides

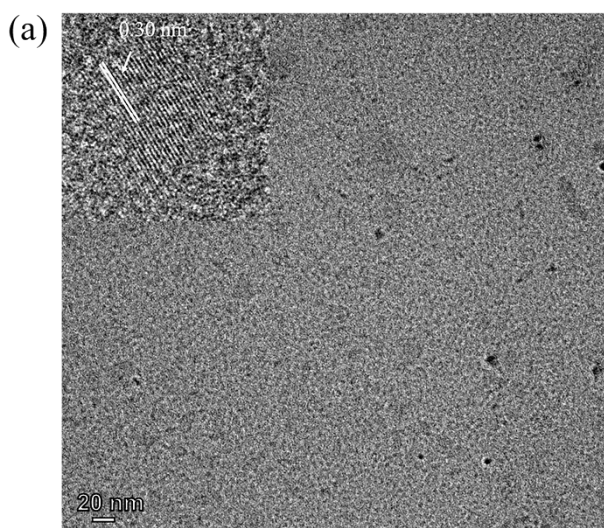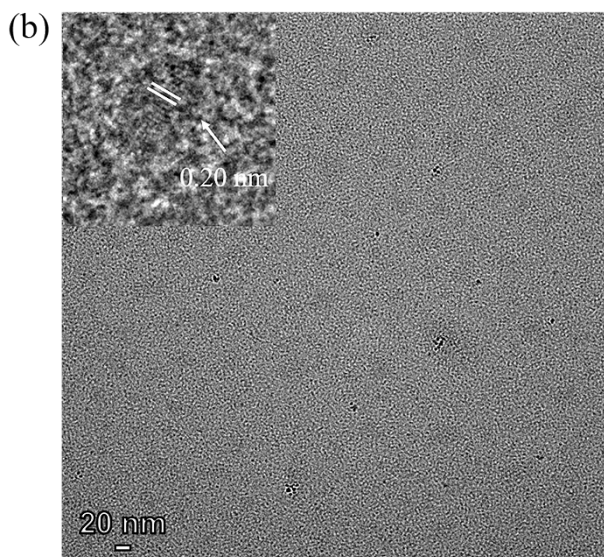

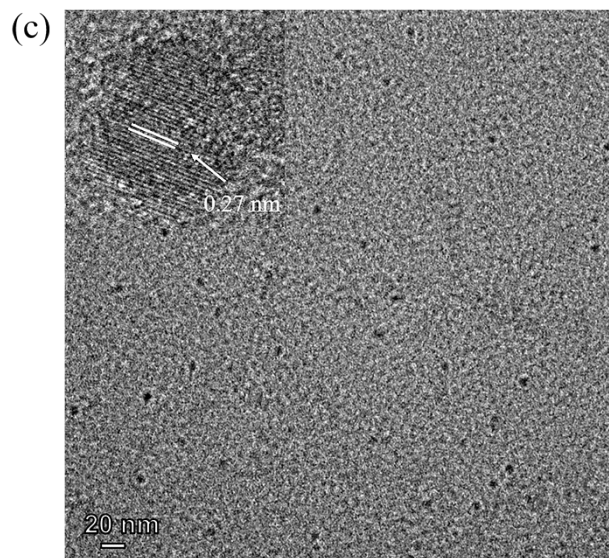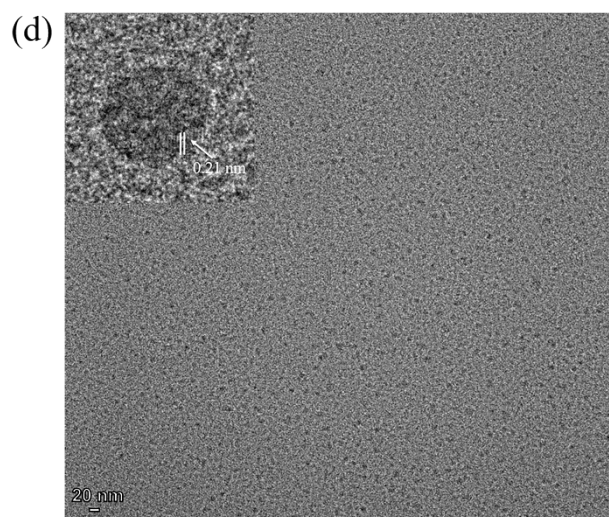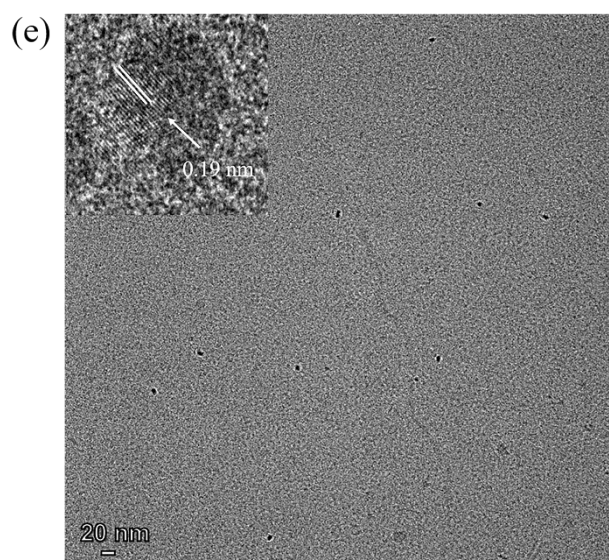

Figure S1 TEM images of (a) G-CDs, (b) GS-CDs, (c) NCDs-1, (d) NCDs-2 and (e) NCDs-3.

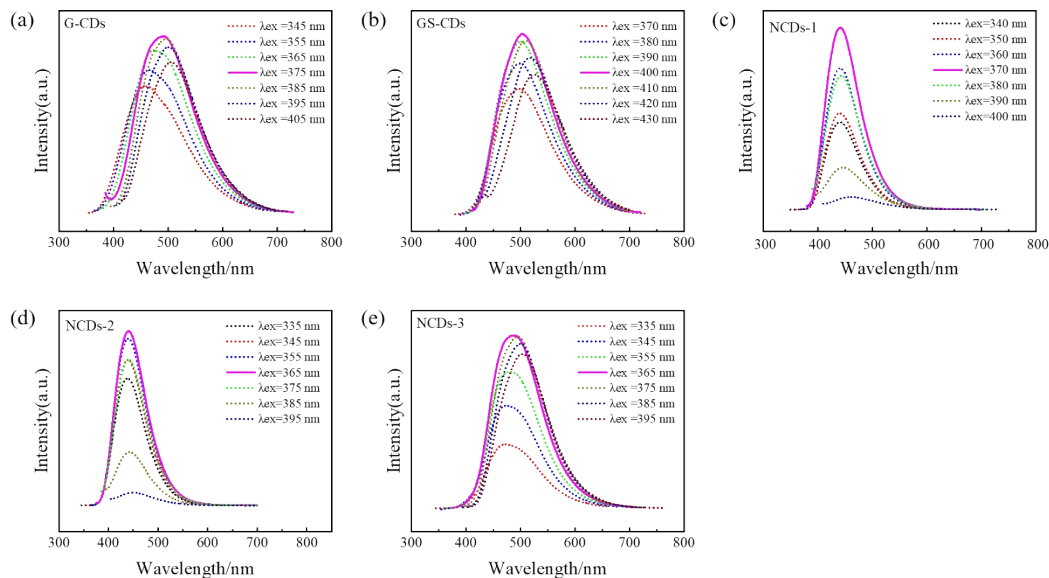

Figure S2 The fluorescence spectra of (a) G-CDs, (b) GS-CDs, (c) NCDs-1, (d) NCDs-2, and (e) NCDs-3 under different excitation wavelengths.

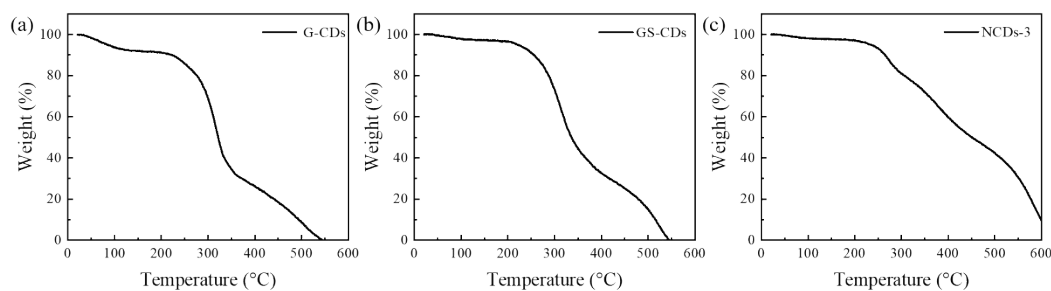

Figure S3 Thermogravimetric analysis (TGA) for (a) G-CD, (b) GS-CDs, (c) NCDs-3.

Table S1 Percentage of N atoms in NCDs-1, NCDs-2 and NCDs-3 as determined by XPS measurements

| Sample | NCDs-1                     | NCDs-2                     | NCDs-3                     |
|--------|----------------------------|----------------------------|----------------------------|
| N%     | 4.5% (4.42% <sup>a</sup> ) | 5.2% (5.31% <sup>a</sup> ) | 8.6% (9.01% <sup>a</sup> ) |

<sup>a</sup> N content calculated by elemental analysis

Table S2 Cycloaddition reactions with various epoxides <sup>a</sup>

| Entry | Epoxide                                                                             | Product                                                                             | Time (h) | Yield (%)<br><sub>b</sub> | Selectivity (%)<br><sub>b</sub> | TOF (mmol <sub>yield</sub> /g <sub>cat</sub> /h) |
|-------|-------------------------------------------------------------------------------------|-------------------------------------------------------------------------------------|----------|---------------------------|---------------------------------|--------------------------------------------------|
| 1     | 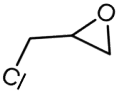   |    | 3        | 42                        | >99                             | 17.5                                             |
| 2     |    |    | 3        | 75                        | >99                             | 31.2                                             |
| 3     |   |   | 3        | 85                        | >99                             | 35.4                                             |
| 4     |  |  | 3        | 5                         | >99                             | 2.0                                              |
| 5     |  |  | 3        | 99                        | >99                             | 41.2                                             |

<sup>a</sup> Conditions: 5 mmol epoxide, 40 mg NCDs-3, 2.4 mol% KI, 1 atm of CO<sub>2</sub>, 100 °C.

<sup>b</sup> Yield and selectivity were calculated by <sup>1</sup>H NMR



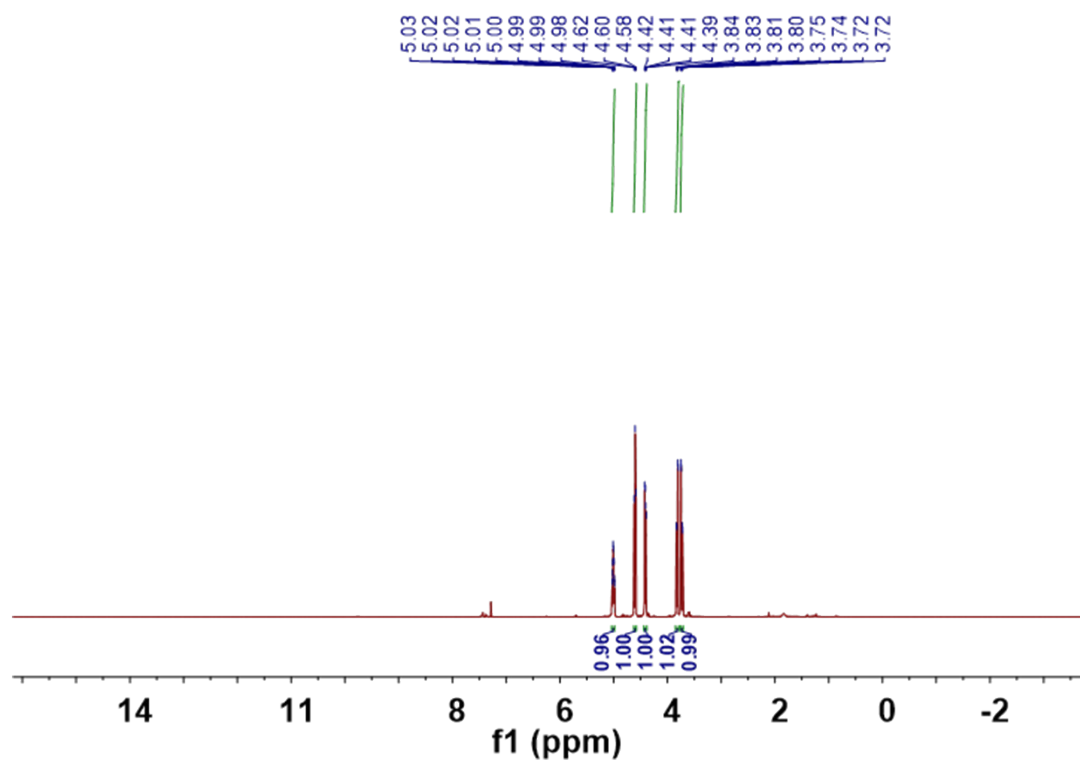

Figure S4  $^1\text{H}$  NMR spectra of 4-(chloromethyl)-1,3-dioxolan-2-one.

$^1\text{H}$  NMR (500 MHz,  $\text{CDCl}_3$ )  $\delta$  5.01 (ddd,  $J = 14.2, 5.4, 3.6$  Hz, 1H), 4.60 (t,  $J = 8.6$  Hz, 1H), 4.41 (dd,  $J = 8.9, 5.7$  Hz, 1H), 3.82 (dd,  $J = 12.2, 5.1$  Hz, 1H), 3.73 (dd,  $J = 12.2, 3.6$  Hz, 1H).

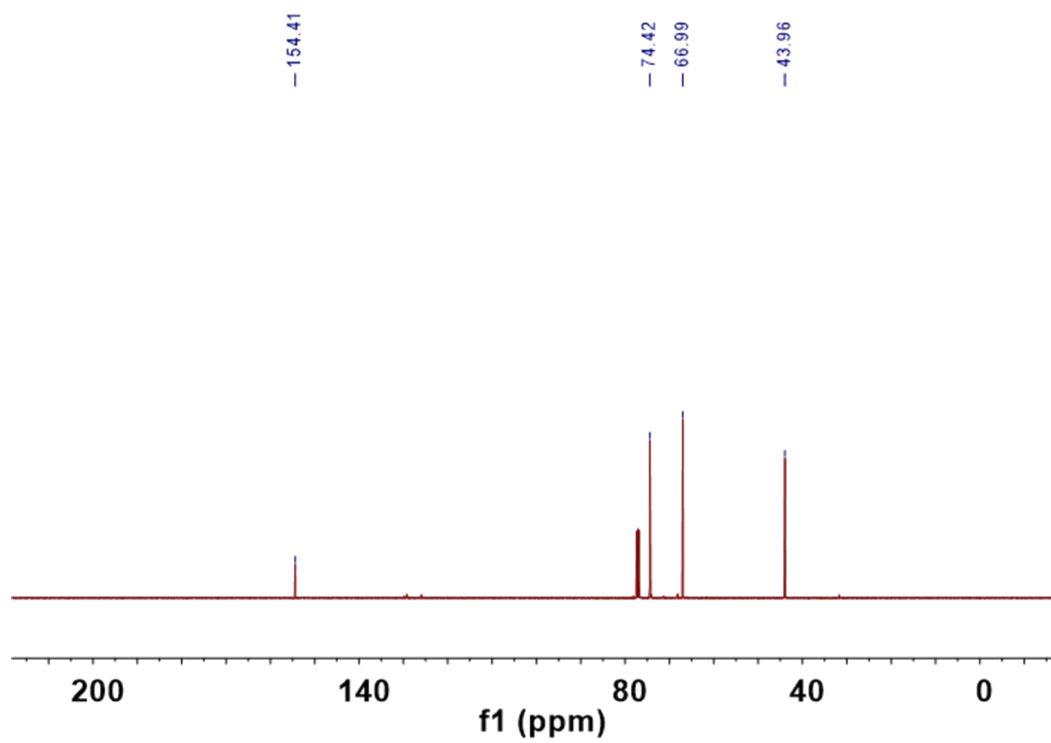

Figure S5 <sup>13</sup>C NMR spectra of 4-(chloromethyl)-1,3-dioxolan-2-one.

<sup>13</sup>C NMR (126 MHz, CDCl<sub>3</sub>) δ 154.41 (s), 74.42 (s), 66.99 (s), 43.96 (s).

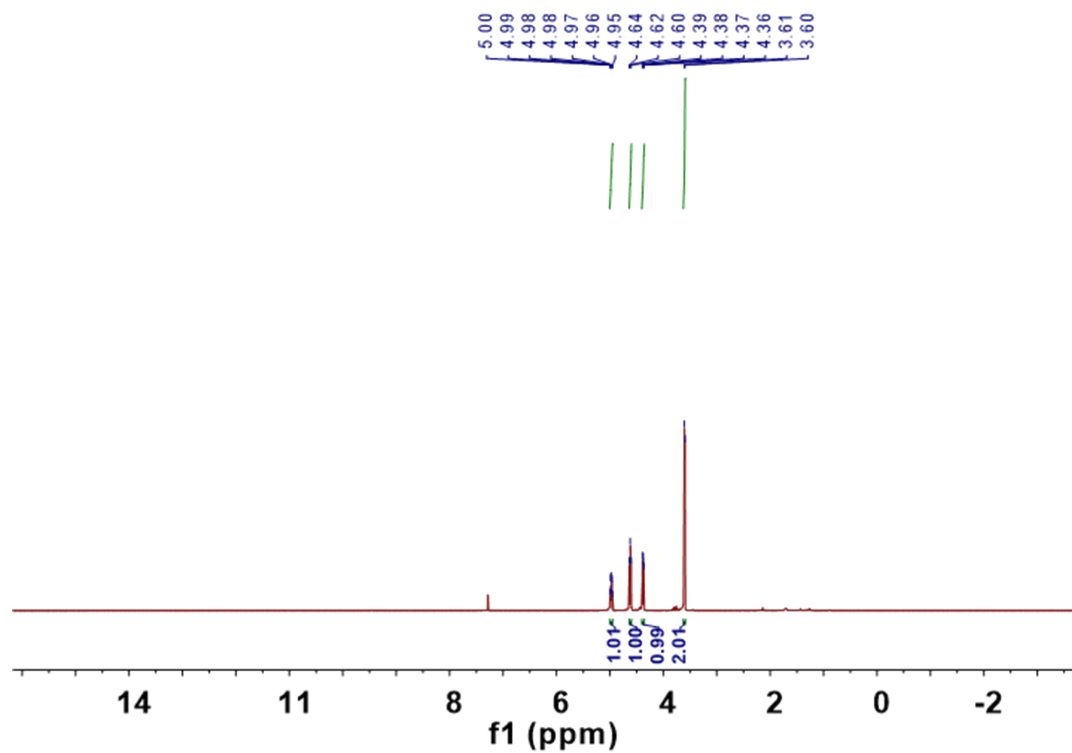

Figure S6 <sup>1</sup>H NMR spectrum of 4-(bromomethyl)-1,3-dioxolan-2-one.  
<sup>1</sup>H NMR (500 MHz, CDCl<sub>3</sub>) δ 5.00 – 4.95 (m, 1H), 4.64 – 4.60 (m, 1H), 4.38 (dd, *J* = 8.9, 5.9 Hz, 1H), 3.60 (d, *J* = 5.2 Hz, 2H).



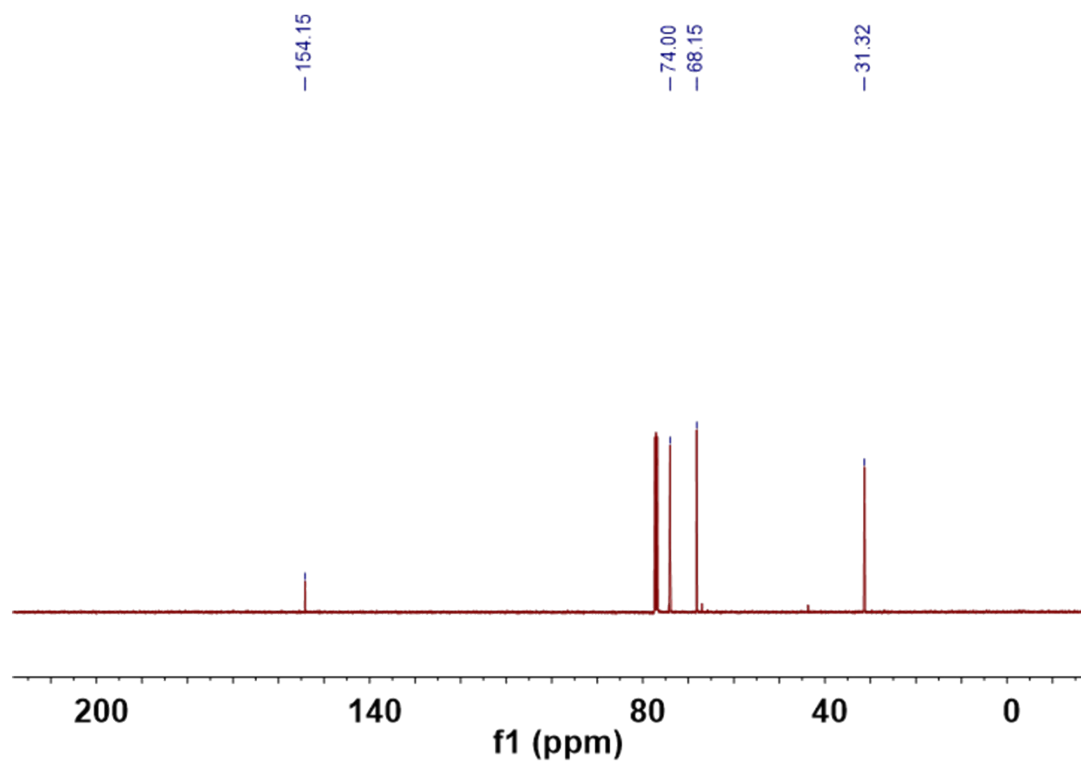

Figure S7  $^{13}\text{C}$  NMR spectrum of 4-(bromomethyl)-1,3-dioxolan-2-one.  
 $^{13}\text{C}$  NMR (126 MHz,  $\text{CDCl}_3$ )  $\delta$  154.15 (s), 74.00 (s), 68.15 (s), 31.32 (s).

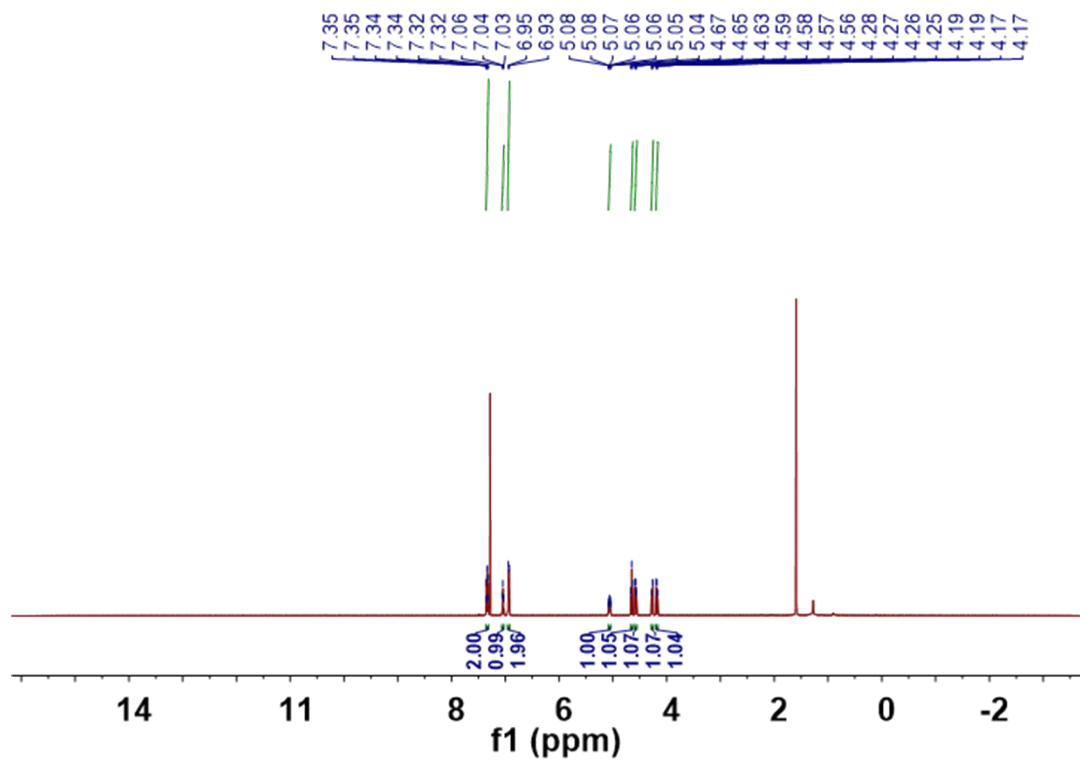

Figure S8  $^1\text{H}$  NMR spectra of 4-(phenoxymethyl)-1,3-dioxolan-2-one.

$^1\text{H}$  NMR (500 MHz,  $\text{CDCl}_3$ )  $\delta$  7.36 – 7.31 (m, 2H), 7.04 (t,  $J = 7.4$  Hz, 1H), 6.94 (d,  $J = 7.9$  Hz, 2H), 5.08 – 5.04 (m, 1H), 4.65 (t,  $J = 8.4$  Hz, 1H), 4.57 (dd,  $J = 8.5, 5.9$  Hz, 1H), 4.27 (dd,  $J = 10.5, 4.3$  Hz, 1H), 4.18 (dd,  $J = 10.5, 3.6$  Hz, 1H).

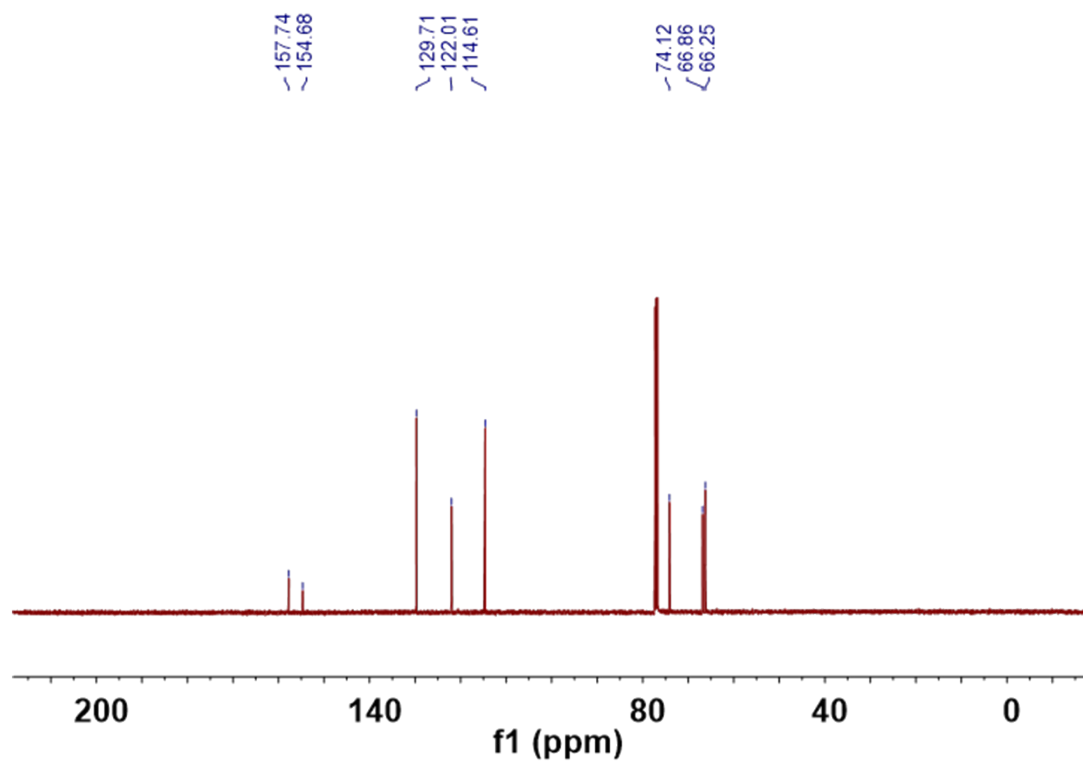

Figure S9  $^{13}\text{C}$  NMR spectra of 4-(phenoxyethyl)-1,3-dioxolan-2-one.  
 $^{13}\text{C}$  NMR (126 MHz,  $\text{CDCl}_3$ )  $\delta$  157.74 (s), 154.68 (s), 129.71 (s), 122.01 (s), 114.61 (s), 74.12 (s), 66.86 (s), 66.25 (s).

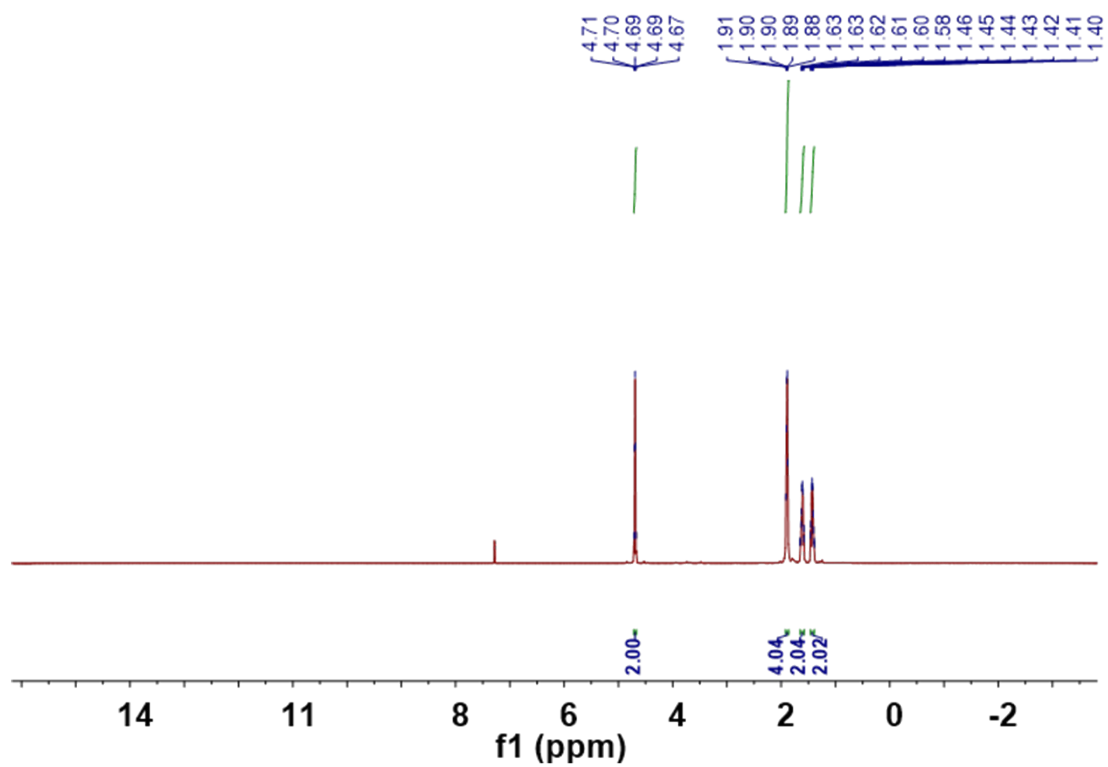

Figure S10 <sup>1</sup>H NMR spectrum of cyclohexene carbonate.

<sup>1</sup>H NMR (500 MHz, CDCl<sub>3</sub>) δ 4.72 – 4.67 (m, 1H), 1.92 – 1.86 (m, 2H), 1.62 (tt, *J* = 13.5, 6.9 Hz, 1H), 1.46 – 1.39 (m, 1H).

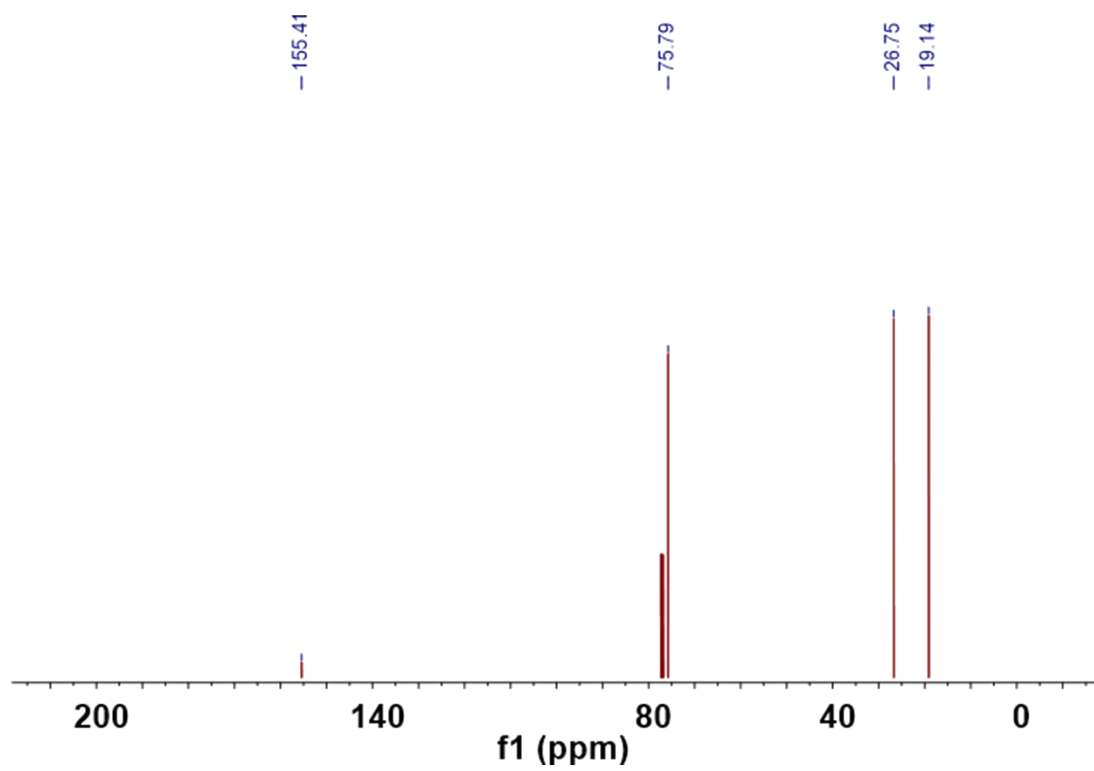

Figure S11 <sup>13</sup>C NMR spectrum of cyclohexene carbonate.  
<sup>13</sup>C NMR (126 MHz, CDCl<sub>3</sub>) δ 155.41 (s), 75.79 (s), 26.75 (s), 19.14 (s).

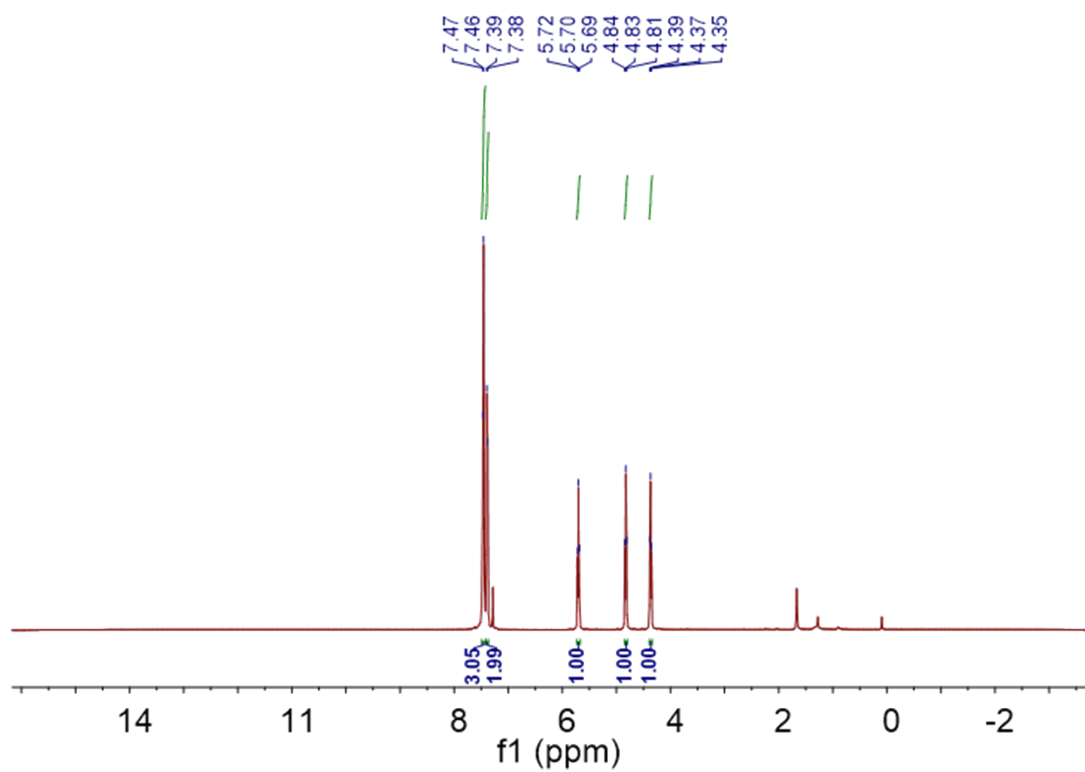

Figure S12 <sup>1</sup>H NMR spectrum of 4-phenyl-1, 3-dioxolan-2-one

<sup>1</sup>H NMR (500 MHz, CDCl<sub>3</sub>) δ 7.46 (d, *J* = 6.8 Hz, 1H), 7.39 (d, *J* = 7.1 Hz, 1H), 4.83 (t, *J* = 8.4 Hz, 1H), 4.37 (t, *J* = 8.2 Hz, 1H).

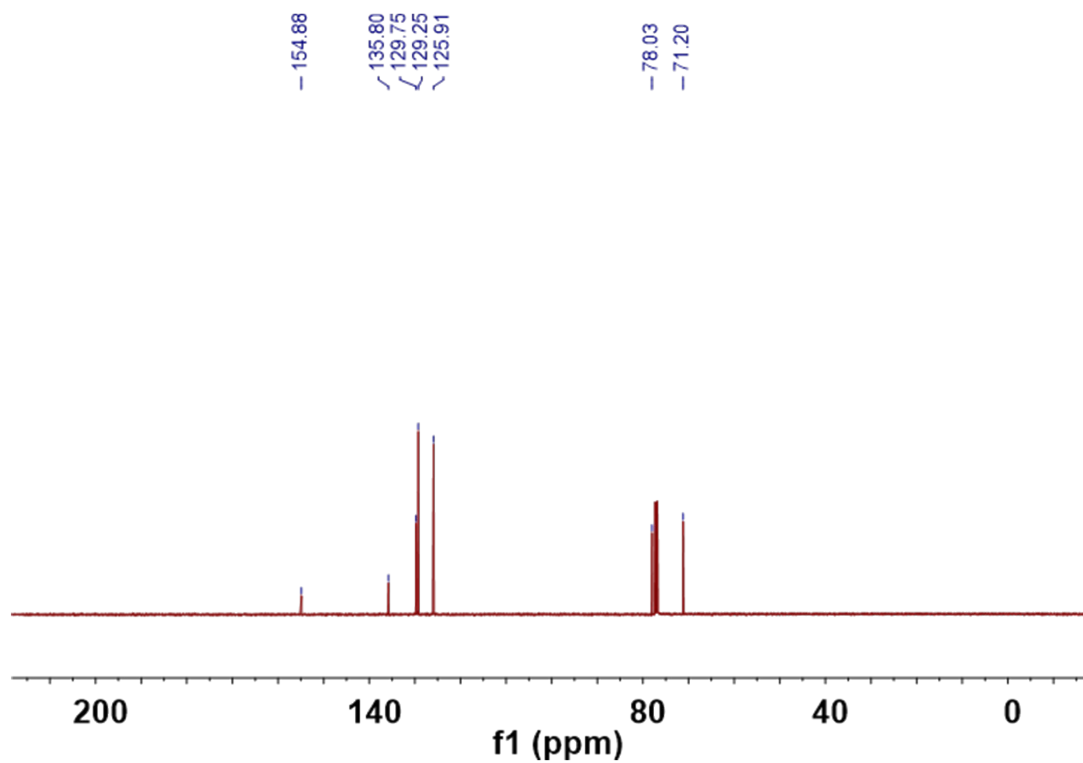

Figure S13  $^{13}\text{C}$  NMR spectrum of 4-phenyl-1,3-dioxolan-2-one.  $^{13}\text{C}$  NMR (126 MHz,  $\text{CDCl}_3$ )  $\delta$  154.88 (s), 135.80 (s), 129.75 (s), 129.25 (s), 125.91 (s), 78.03 (s), 71.20 (s).

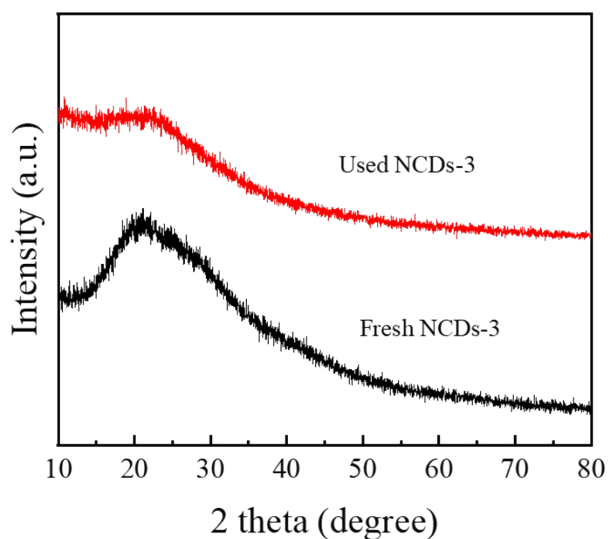

Figure S14 XRD spectra of fresh and used NCDs-3

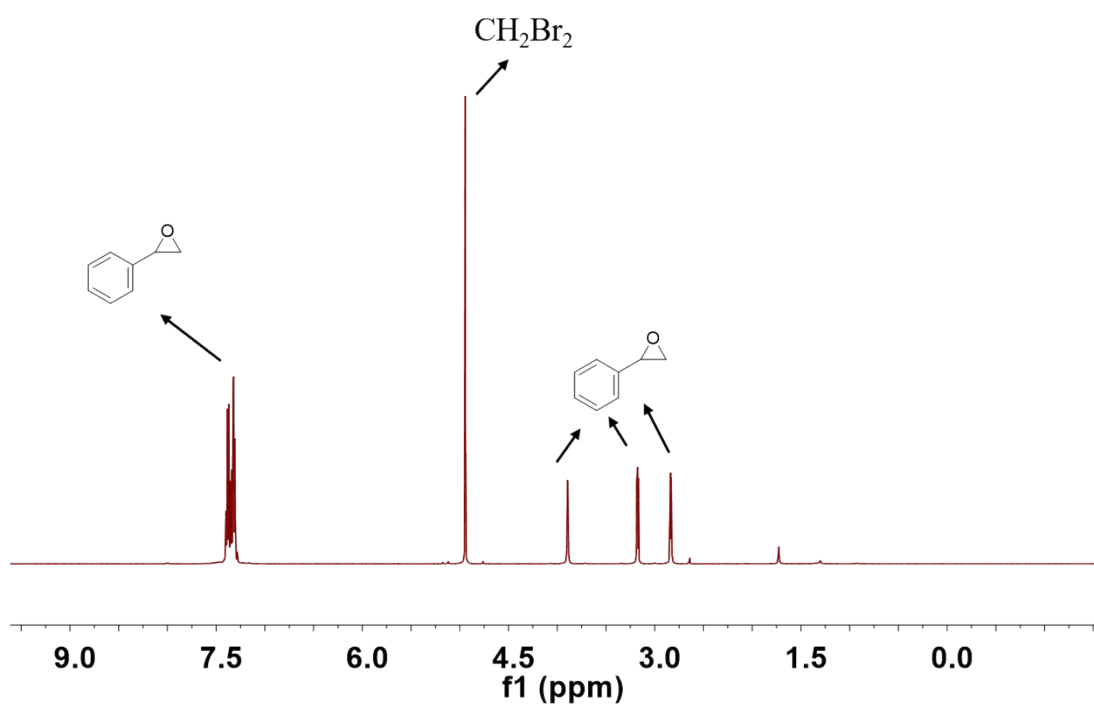

Figure S 15 the selectivity of the reaction (catalyst: 40 mg G-CDs, cocatalyst: 2.4 mol% KI as shown in Table 1)



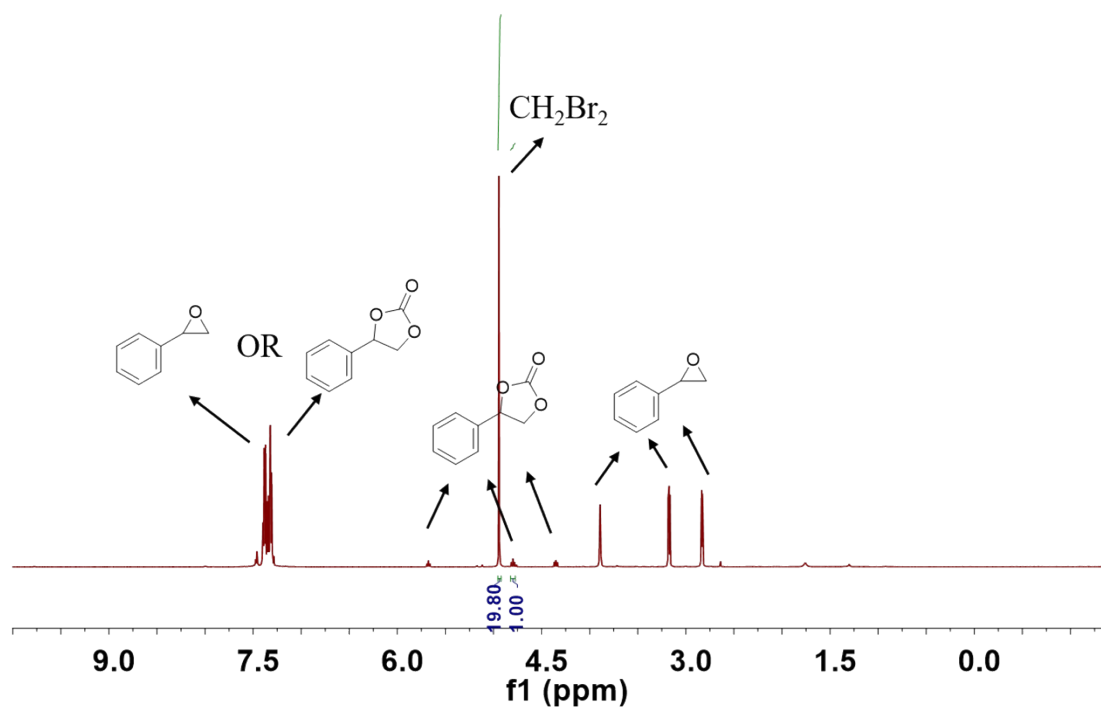

Figure S16 the selectivity of the reaction (catalyst: 40 mg GS-CDs, cocatalyst: 2.4 mol% KI as shown in Table 1)

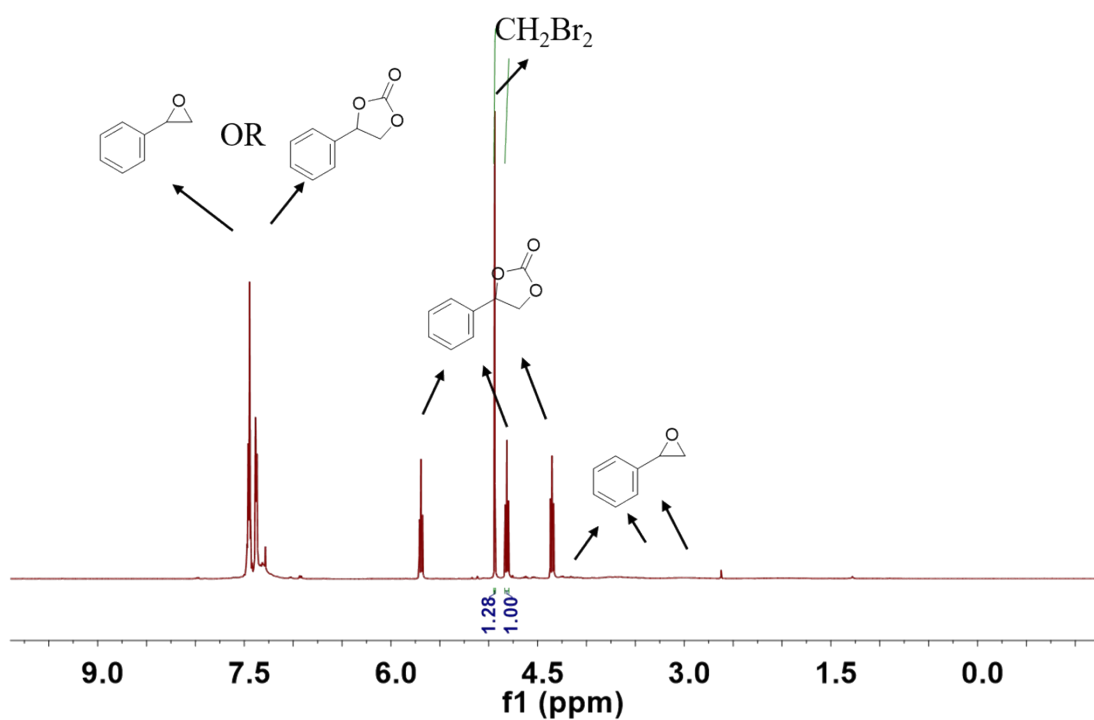

Figure S 17 the selectivity of the reaction (catalyst: 40 mg NCDs-1, cocatalyst: 2.4 mol% KI as shown in Table 1)

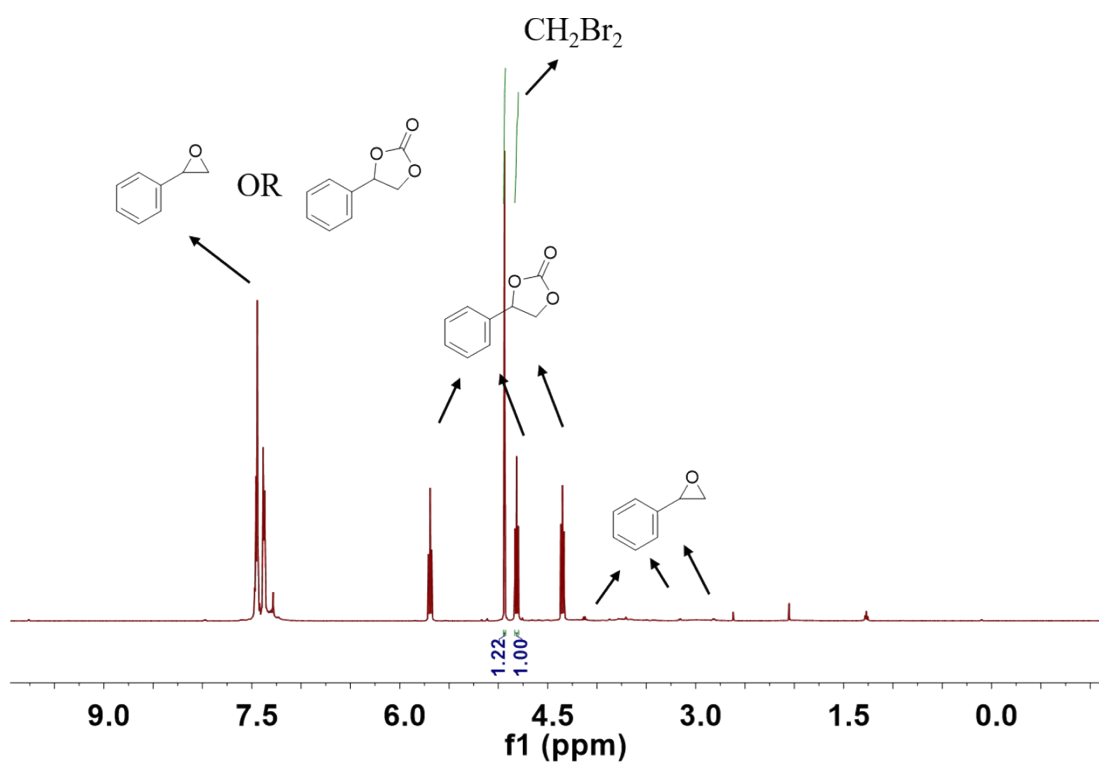

Figure S 18 the selectivity of the reaction (catalyst: 40 mg NCDs-2, cocatalyst: 2.4 mol% KI as shown in Table 1)

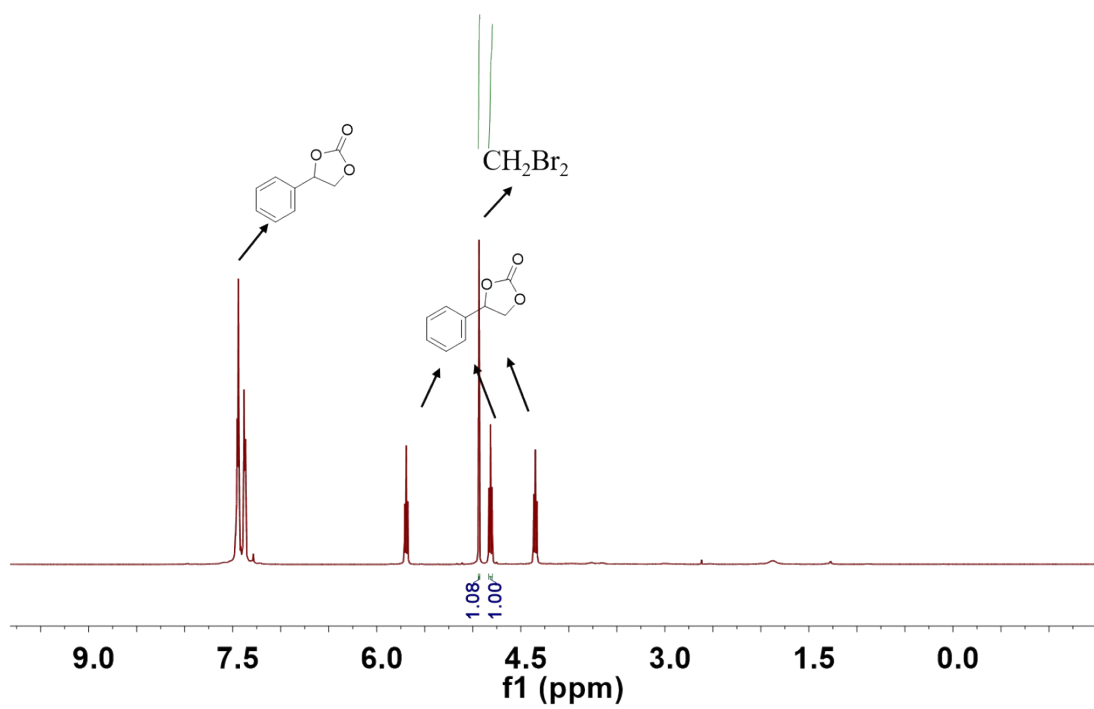

Figure S 19 the selectivity of the reaction (catalyst: 40 mg NCDs-3, cocatalyst: 2.4 mol% KI as shown in Table 1)
